# Supplementary material for: Solvate ionic liquid-derived solid polymer electrolyte with lithium bis(oxalato) borate as a functional additive for solid-state lithium metal batteries
Source: Royal Society of Chemistry journal article supplement (doi:10.1039/d2ta07393e), 2022-12-05
Supplement: d2ta07393e1.pdf [file d2ta07393e1.pdf]

## Supplementary Materials for

### **Solvate ionic liquid derived solid polymer electrolyte with lithium bis(oxalato) borate as a functional additive for solid-state lithium metal batteries**

Yan Yuan<sup>1,2\*</sup>, Xiuping Peng<sup>1</sup>, Bin Wang<sup>1</sup>, Kesi Xue<sup>1</sup>, Zhengqian Li<sup>1</sup>, Yitian Ma<sup>3</sup>, Bin Zheng<sup>3</sup>, Yonghui Song<sup>1,2</sup>, Hai Lu<sup>3\*</sup>

<sup>1</sup>School of Metallurgical Engineering, Xi'an University of Architecture and Technology, Xi'an 710055, China

<sup>2</sup>Shaanxi Key Laboratory of Gold and Resources, Xi'an 710055, China

<sup>3</sup>School of Materials Science and Engineering, Xi'an University of Science and Technology, Xi'an 710054, China

---

\* Corresponding author 1#: Tel.: +86 29 82202923  
E-mail address: lingyi21@126.com

\* Corresponding author 2#: Tel.: +86 29 85587373  
E-mail address: lhxust@126.com

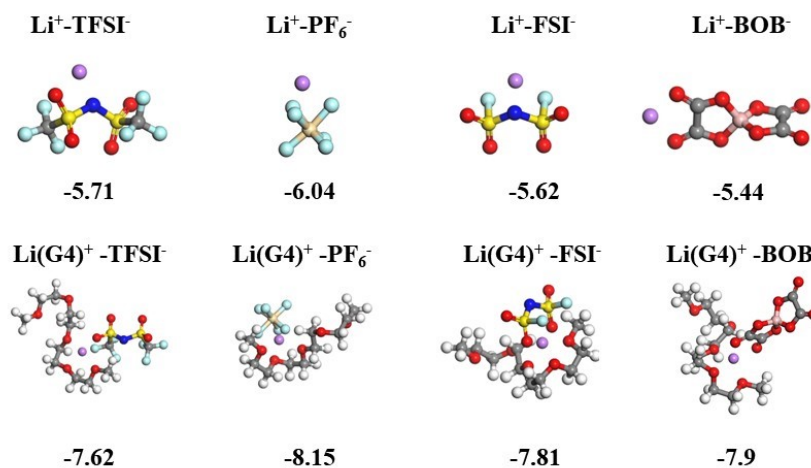

Fig.S1 Interactions of Li ion or solvated Li ion with various counteranions. The gas-phase binding energy for each configuration is expressed in eV.

Herein, a credible selection rule of the Li salt additive for the SIL-derived SPE can be concluded simply according to the order of binding energy (E):

- i)  $E_{Li-X} > E_{Li-TFSI}$  and  $E_{Li(solvent)-X} < E_{Li(solvent)-TFSI}$ : LiX is easily dissociated and the resulted  $X^-$  is inclined to substitute for TFSI<sup>-</sup> in the LIP.
- ii)  $E_{Li-X} > E_{Li-TFSI}$  and  $E_{Li(solvent)-X} > E_{Li(solvent)-TFSI}$ : LiX is easily dissociated but the resulted  $X^-$  is hard to substitute for TFSI<sup>-</sup> in the LIP.
- iii)  $E_{Li-X} < E_{Li-TFSI}$  (usually  $E_{Li(solvent)-X} < E_{Li(solvent)-TFSI}$ ): the dissociation of LiX and the resulted  $X^-$  could be limited, and/or the closely-contacted ion pair in IIP is mainly dominated by Li<sup>+</sup>-X<sup>-</sup> complex.

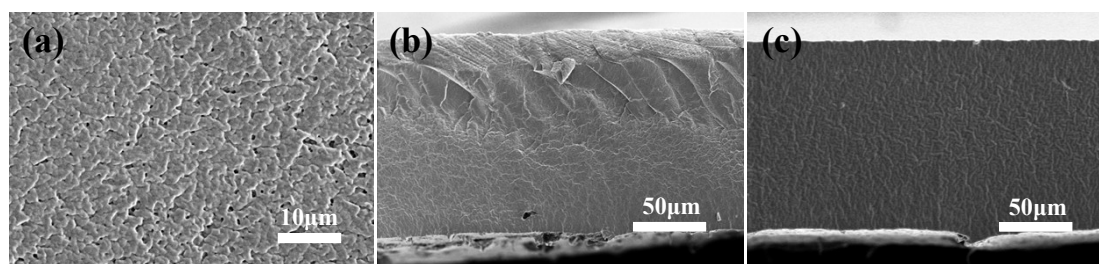

Fig. S2 (a) Surface and (b) cross-section SEM images of PVDF-HFP/LiTFSI; (c) Cross-section SEM images of PLGB

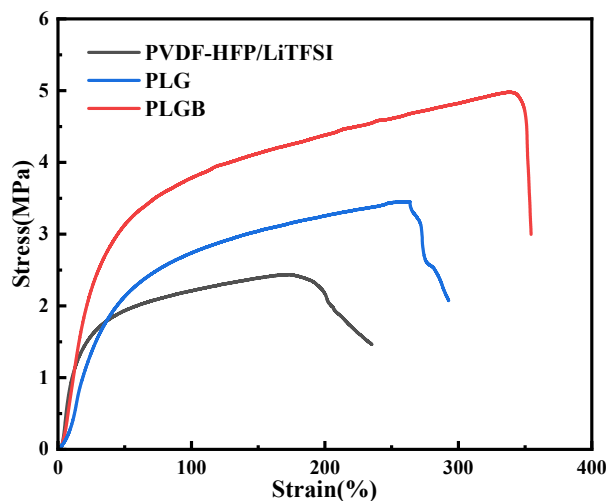

Fig. S3 Tensile stress-strain curves of various SPE films with the same thickness

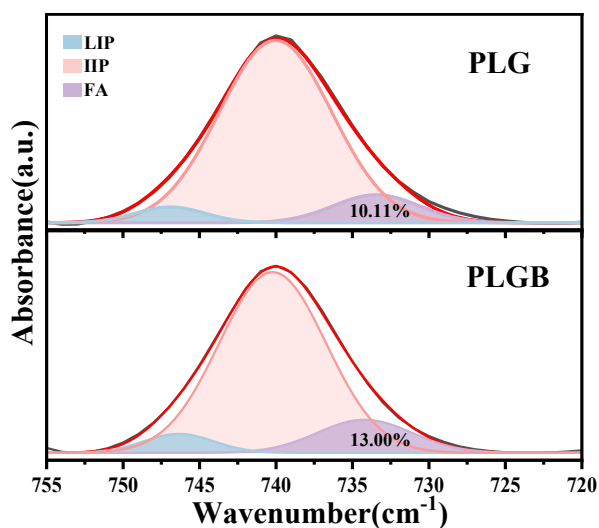

Fig. S4 Divided FTIR spectra of PLG and PLGB in the range of 755~720 cm<sup>-1</sup>

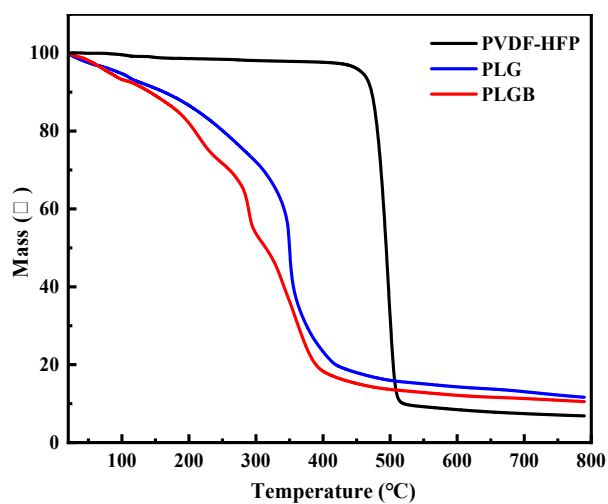

Fig. S5 TGA curves of pristine PVDF-HFP, as-prepared PLG and PLGB

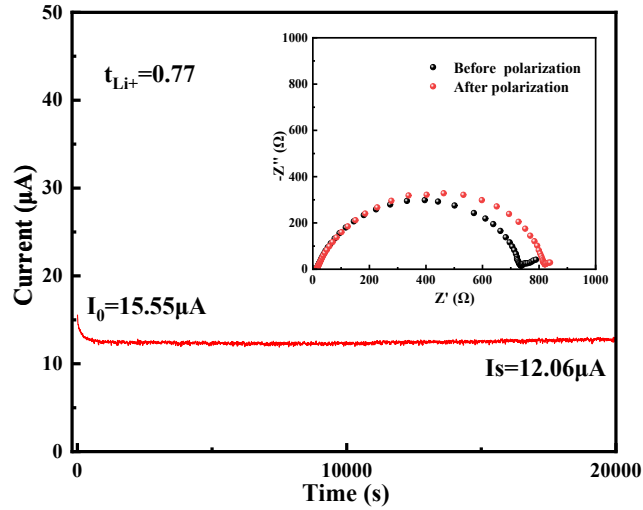

**Fig. S6** Current-time curve of the symmetrical Li|PLG|Li cell obtained from chronoamperometry with an applied polarization voltage of 10 mV (the inset shows the Nyquist profiles before and after polarization)

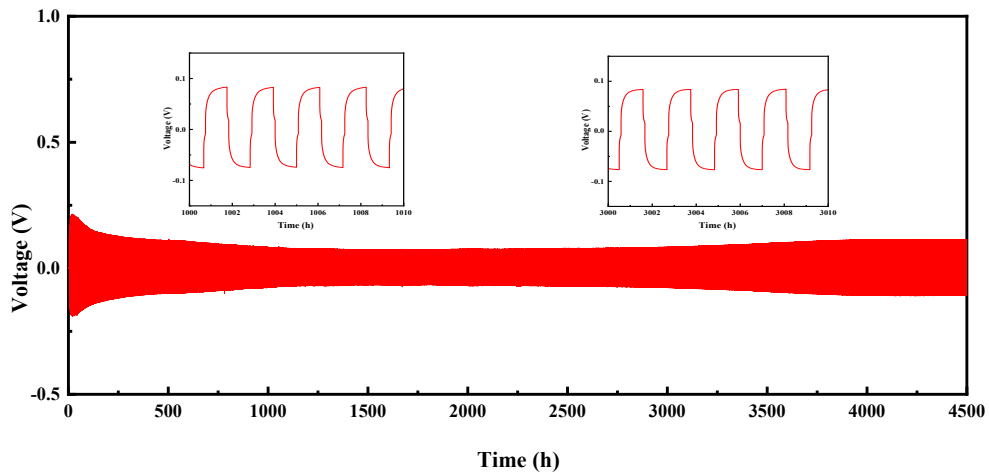

**Fig. S7** Galvanostatic cycling profile of the symmetrical Li|PLGB-3|Li cell at the current density of  $0.05 \text{ mA cm}^{-2}$  at RT

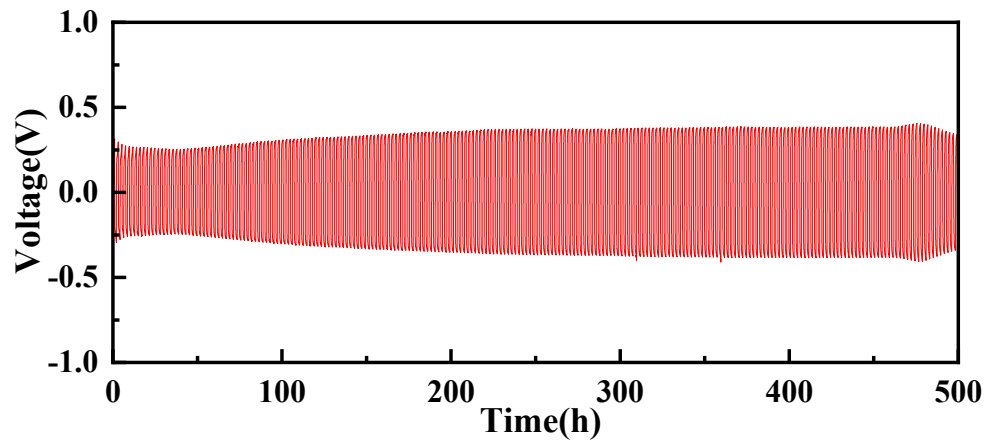

Fig. S8 Galvanostatic cycling profile of the symmetrical Li|PLGB-3|Li cell at the current density of  $0.2 \text{ mA cm}^{-2}$  at RT

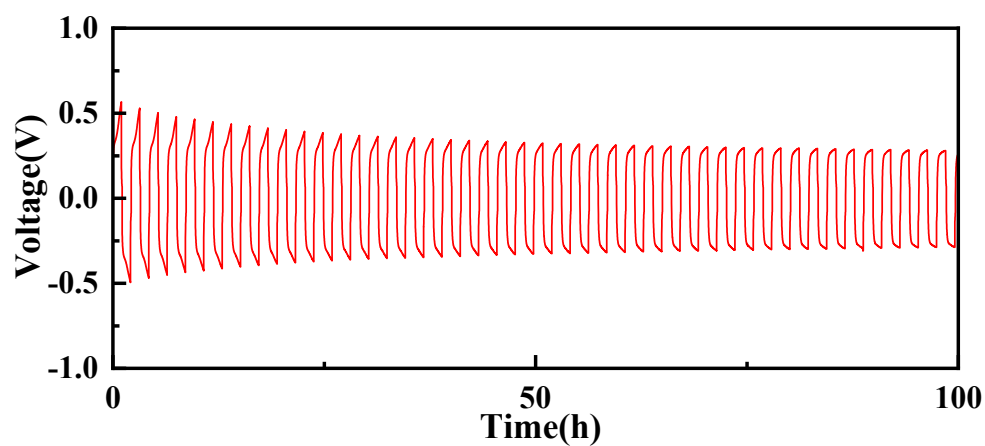

Fig. S9 Galvanostatic cycling profile of the symmetrical Li|PLGB-3|Li cell at the current density of  $0.5 \text{ mA cm}^{-2}$  at RT

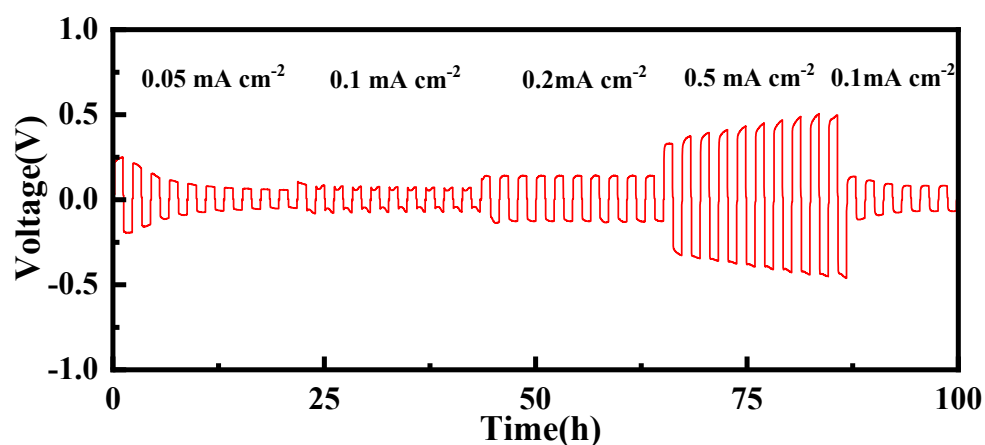

Fig. S10 Galvanostatic cycling profile of the symmetrical Li|PLGB-3|Li cell at various current densities

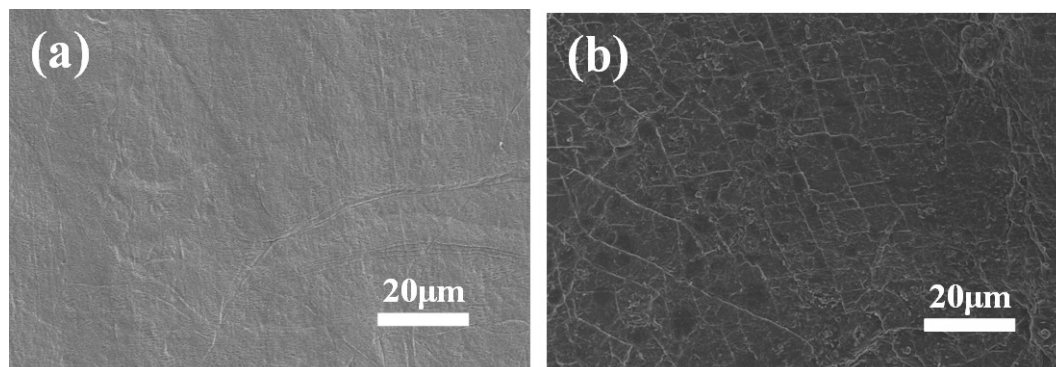

Fig. S11 SEM images of (a) fresh Li metal, (b) Li metal from the symmetrical Li|PLGB-3|Li cell after 2000h for Li stripping/plating at  $0.1 \text{ mA cm}^{-2}$

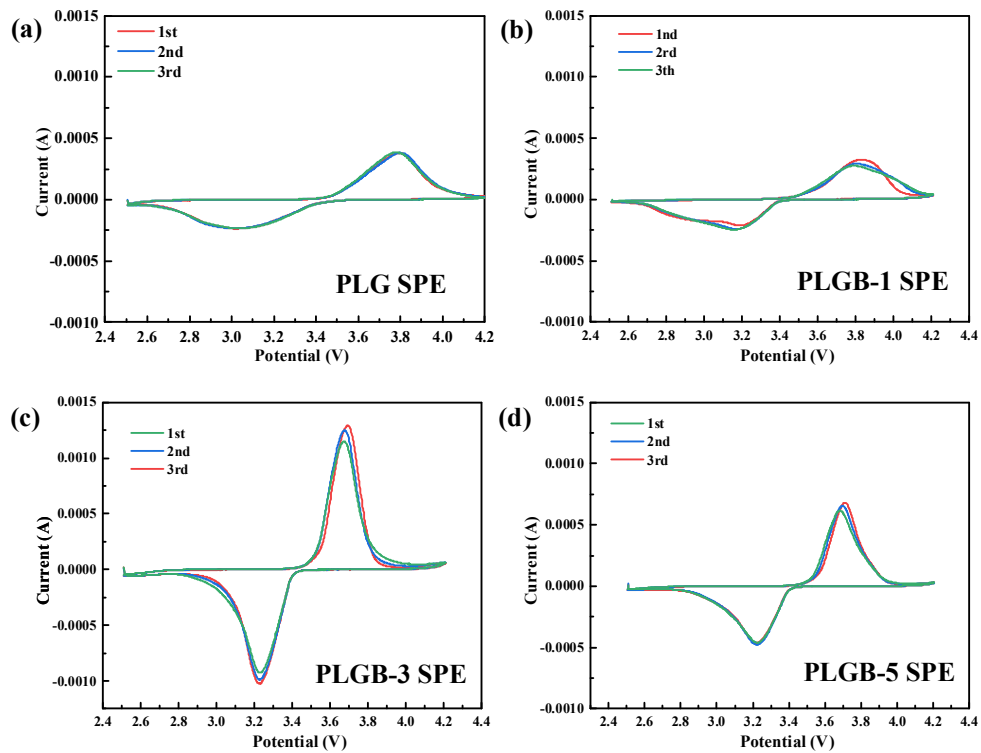

**Fig. S12 CV curves of the LFP/Li cells with different SPEs**

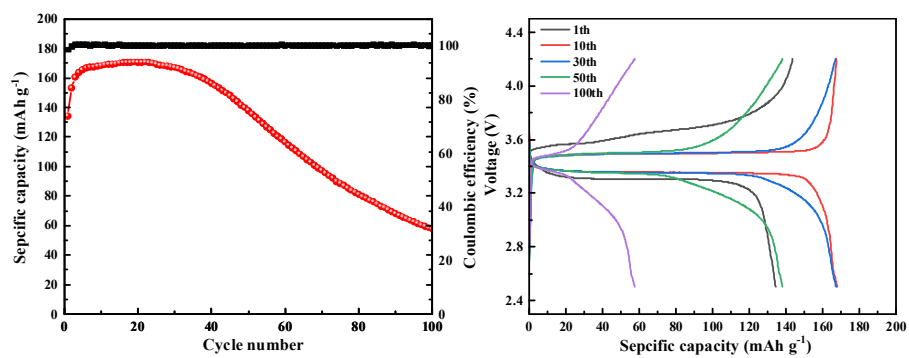

**Fig.S13 Cycle performance of the LFP|PLG|Li cell at the rate of 0.1C**

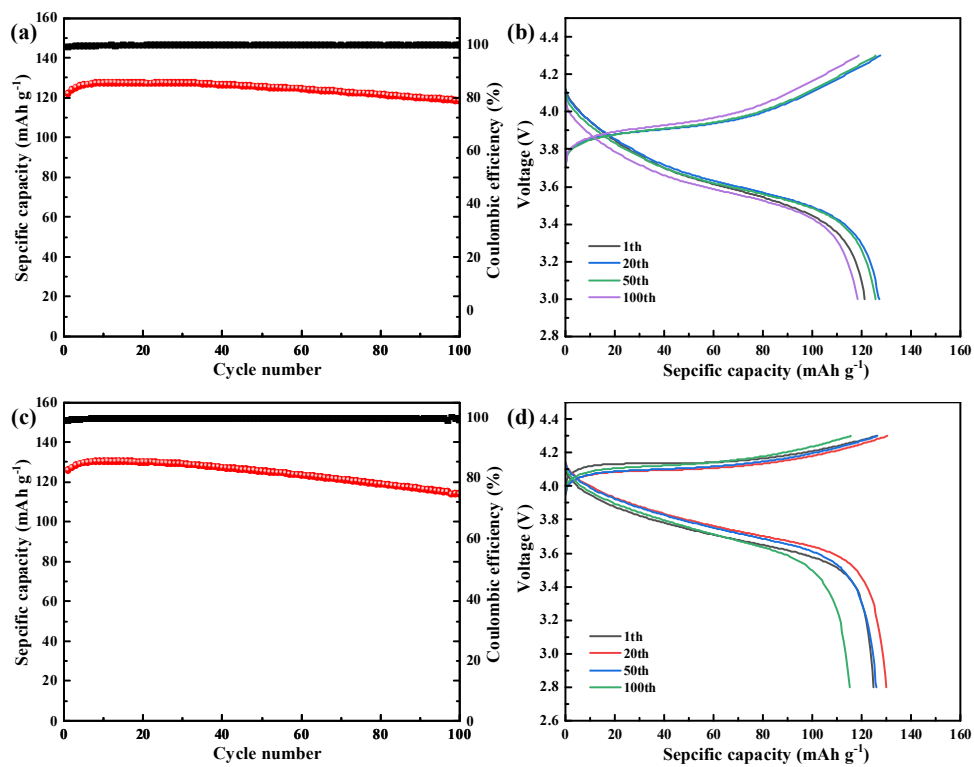

**Fig. S14 (a) Cycle performance and (b) potential curves of NCM523|PLGB-3|Li cell at the current rate of 0.5C at RT; (c) Cycle performance and (d) potential curves of LCO|PLGB-3|Li cell at the current rate of 0.5C at RT**

**Table S1 Solvate species distribution proportion (%) in various liquid and solid electrolyte systems based on Raman spectra**

| Sample | Composition                                   | FA   | LIP   | IIP  |
|--------|-----------------------------------------------|------|-------|------|
| LG     | [Li(G4) <sub>1</sub> ][TFSI]                  | 0    | 93    | 7    |
| LGB    | [Li(G4) <sub>1</sub> ][TFSI]+LiBOB            | 3.72 | 87.42 | 8.79 |
| PLG    | [Li(G4) <sub>1</sub> ][TFSI] / PVDF-HFP       | 7.90 | 87.73 | 4.37 |
| PLGB   | [Li(G4) <sub>1</sub> ][TFSI]+LiBOB / PVDF-HFP | 8.89 | 83.30 | 7.80 |

**Table S2 Solvate species distribution proportion (%) in two solid electrolyte systems based on FT-IR spectra**

| Sample | Composition                                   | FA    | LIP   | IIP  |
|--------|-----------------------------------------------|-------|-------|------|
| PLG    | [Li(G4) <sub>1</sub> ][TFSI] / PVDF-HFP       | 10.11 | 85.21 | 4.68 |
| PLGB   | [Li(G4) <sub>1</sub> ][TFSI]+LiBOB / PVDF-HFP | 13.00 | 81.37 | 5.63 |

**Table S3 Overall comparison of the electrolyte properties and cell performances in previous reports**

| Electrolyte                                                  | $\sigma$ /S cm <sup>-1</sup> at RT | $E_{ox}$ /V | $t_{Li^+}$  | Performance                                                        | Ref.             |
|--------------------------------------------------------------|------------------------------------|-------------|-------------|--------------------------------------------------------------------|------------------|
| PEO/HACCTFSI                                                 | 1.9×10 <sup>-7</sup> (60 °C)       | 5.26        | 0.34        | 157 mAh g <sup>-1</sup> , 100 <sup>th</sup> -98%, 0.2C, 60 °C      | 1                |
| PEO/LLZO/SiO <sub>2</sub> /Py <sub>14</sub> FSI              | 7.4×10 <sup>-4</sup>               | 5.5         |             | 140 mAh g <sup>-1</sup> , 100 <sup>th</sup> -96.4%, 0.1C, 25 °C    | 2                |
| PEO/TiO <sub>2</sub> /Li <sub>2</sub> S <sub>6</sub>         | 1.7×10 <sup>-4</sup> (40 °C)       |             | 0.23        | 140 mAh g <sup>-1</sup> , 700 <sup>th</sup> -80%, 0.2C, 50 °C      | 3                |
| PEO/PEGDA/VMIMFSI                                            | 0.42×10 <sup>-4</sup>              | 5.44        | 0.22        | 147 mAh g <sup>-1</sup> , 50 <sup>th</sup> -77.5%, 0.2C, 55 °C     | 4                |
| PEO/LLZO/BMIMFFSI                                            | 2.2×10 <sup>-4</sup>               | 4.85        | 0.45        | 117 mAh g <sup>-1</sup> , 150 <sup>th</sup> -84.1%, 0.1C, 25 °C    | 5                |
| PVDF-HFP/DMF                                                 | 3×10 <sup>-4</sup>                 | 4.2         | 0.44        | 130 mAh g <sup>-1</sup> , 200 <sup>th</sup> -95%, 0.2C, 25 °C      | 6                |
|                                                              |                                    |             |             | (NCM111)                                                           |                  |
| PEO/Li <sub>6</sub> PS <sub>3</sub> Cl/PP <sub>13</sub> TFSI | 1.12×10 <sup>-4</sup>              |             |             | 165 mAh g <sup>-1</sup> , 50 <sup>th</sup> -89.1%, 0.18C, 25 °C    | 7                |
| PEO/DME                                                      | 1.09×10 <sup>-3</sup>              | 4.5         | 0.43        | 165 mAh g <sup>-1</sup> , 300 <sup>th</sup> -79.2%, 1C, 60 °C      | 8                |
|                                                              |                                    |             |             | (NCM111)                                                           |                  |
| PVDF-HFP/BMIMSCN/<br>CPT                                     | 1.9×10 <sup>-4</sup>               |             |             | 150 mAh g <sup>-1</sup> , 50 <sup>th</sup> -76%, 0.06C, 25 °C      | 9                |
| <b>PVDF-HFP/G4/LiBOB</b>                                     | <b>2.18×10<sup>-3</sup></b>        | <b>5.7</b>  | <b>0.86</b> | <b>143 mAh g<sup>-1</sup>, 500<sup>th</sup>-95.9%, 0.5C, 25 °C</b> | <b>This work</b> |



- 1 J. Tan, X. Ao, A. Dai, Y. Yuan, H. Zhuo, H. Lu, L. Zhuang, Y. Ke, C. Su, X. Peng, B. Tian and J. Lu, *Energy Storage Materials*, 2020, **33**, 173.
- 2 Y. Zhai, G. Yang, Z. Zeng, S. Song, S. Li, N. Hu, W. Tang, Z. Wen, L. Lu and J. Molenda, *ACS Applied Energy Materials*, 2021, **4**, 7973.
- 3 R. Fang, B. Xu, N.S. Grundish, Y. Xia, Y. Li, C. Lu, Y. Liu, N. Wu and J.B. Goodenough, *Angew Chem Int Ed*, 2021, **60**, 17701.
- 4 Y. Li, Z. Sun, L. Shi, S. Lu, Z. Sun, Y. Shi, H. Wu, Y. Zhang and S. Ding, *Chemical Engineering Journal*, 2019, **375**, 121925.
- 5 H. Huo, N. Zhao, J. Sun, F. Du, Y. Li and X. Guo, *Journal of Power Sources*, 2017, **372**, 1.
- 6 Q. Liu, G. Yang, X. Li, S. Zhang, R. Chen, X. Wang, Y. Gao, Z. Wang and L. Chen, *Energy Storage Materials*, 2022, **51**, 443.
- 7 M. Liu, S. Zhang, E.R.H. van Eck, C. Wang, S. Ganapathy and M. Wagemaker, *Nat Nanotechnol*, 2022, **17**, 959.
- 8 H. Wu, Y. Xu, X. Ren, B. Liu, M.H. Engelhard, M.S. Ding, P.Z. El-Khoury, L. Zhang, Q. Li, K. Xu, C. Wang, J.G. Zhang and W. Xu, *Advanced Energy Materials*, 2019, **9**, 1902108.
- 9 J.C. Barbosa, D.M. Correia, E.M. Fernandez, A. Fidalgo-Marijuan, G. Barandika, R. Goncalves, S. Ferdov, V. de Zea Bermudez, C.M. Costa and S. Lanceros-Mendez, *ACS Appl Mater Interfaces*, 2021, **13**, 48889.
